# Supplementary material for: Charge doping and electric field tunable ferromagnetism and Curie temperature of the MnS2 monolayer
Source: Royal Society of Chemistry journal article supplement (doi:10.1039/d3cp04382g), 2023-11-14
Supplement: d3cp04382g1.pdf [file d3cp04382g1.pdf]

## Supplementary Information

### Charge doping and electric field tunable ferromagnetism and Curie temperature in MnS<sub>2</sub> monolayer

Jing Xie <sup>a,\*1</sup>, Dongni Wu <sup>a</sup>, Yangfang Liao <sup>a</sup>, Xiaolong Cao <sup>a</sup>, Shiyu Zhou <sup>a</sup>

<sup>a</sup> College of Physics and Electronic Science, Guizhou Normal University, Guiyang 550001, China

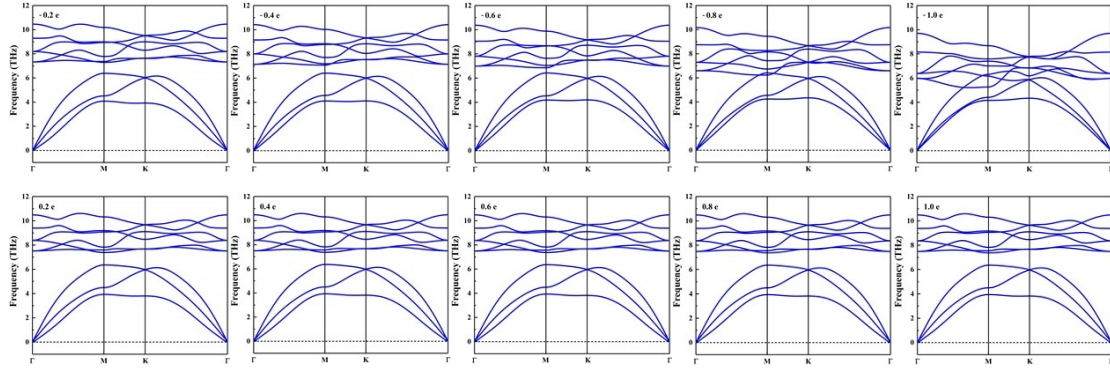

**Fig. S1.** The phonon dispersion spectra of monolayer MnS<sub>2</sub> with the charge doping concentrations of  $\pm 0.2 e$ ,  $\pm 0.4 e$ ,  $\pm 0.6 e$ ,  $\pm 0.8 e$  and  $\pm 1.0 e$ .

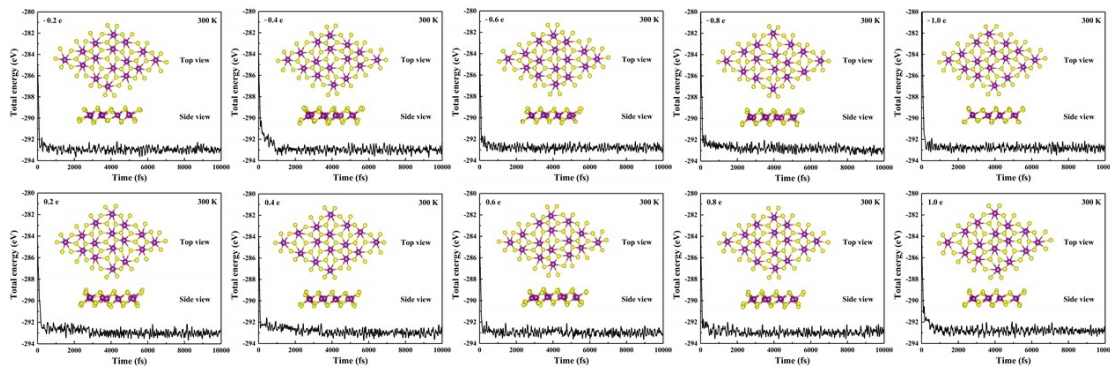

**Fig. S2.** The fluctuations of the total energies as a function of simulation steps for monolayer MnS<sub>2</sub> with the charge doping concentrations of  $\pm 0.2 e$ ,  $\pm 0.4 e$ ,  $\pm 0.6 e$ ,  $\pm 0.8 e$  and  $\pm 1.0 e$ .

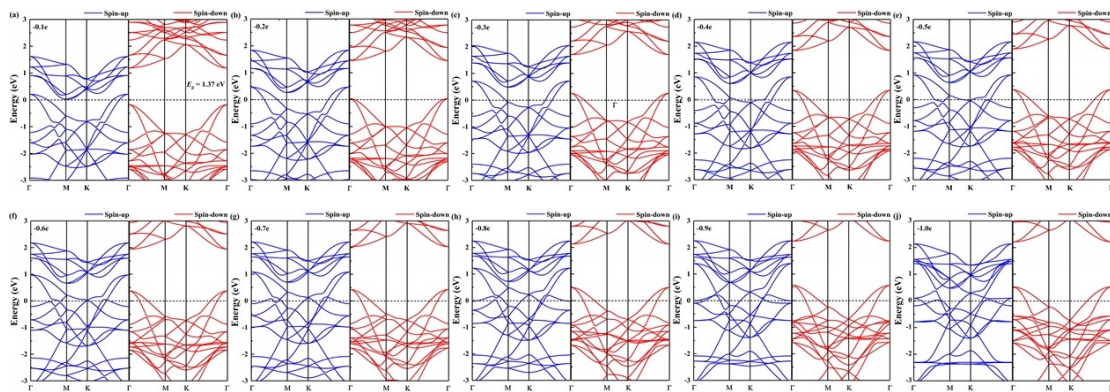

\* Corresponding author.

E-mail address: 511492231@qq.com (Jing Xie).

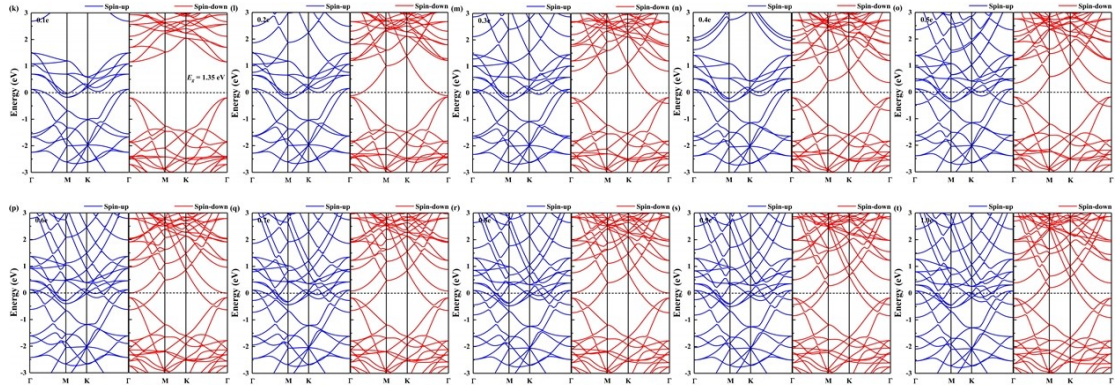

**Fig. S3.** The spin-polarized band structures of monolayer  $\text{MnS}_2$  under various charge doping concentrations.

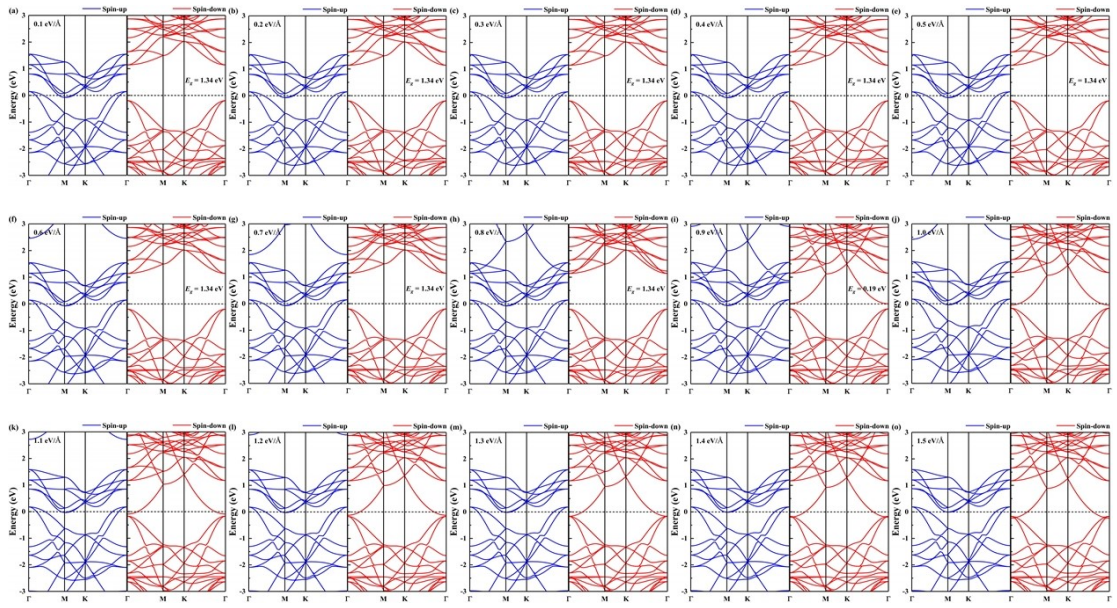

**Fig. S4.** The spin-polarized band structures of monolayer  $\text{MnS}_2$  under different electric field intensities.
